# Supplementary material for: The Developmental Trajectory of Empathy and Its Association with Early Symptoms of Psychopathology in Children with and without Hearing Loss
Source: Springer Nature journal article supplement (doi:10.1007/s10802-021-00816-x), 2021-04-07
Supplement: MOESM1 [file 19044980]

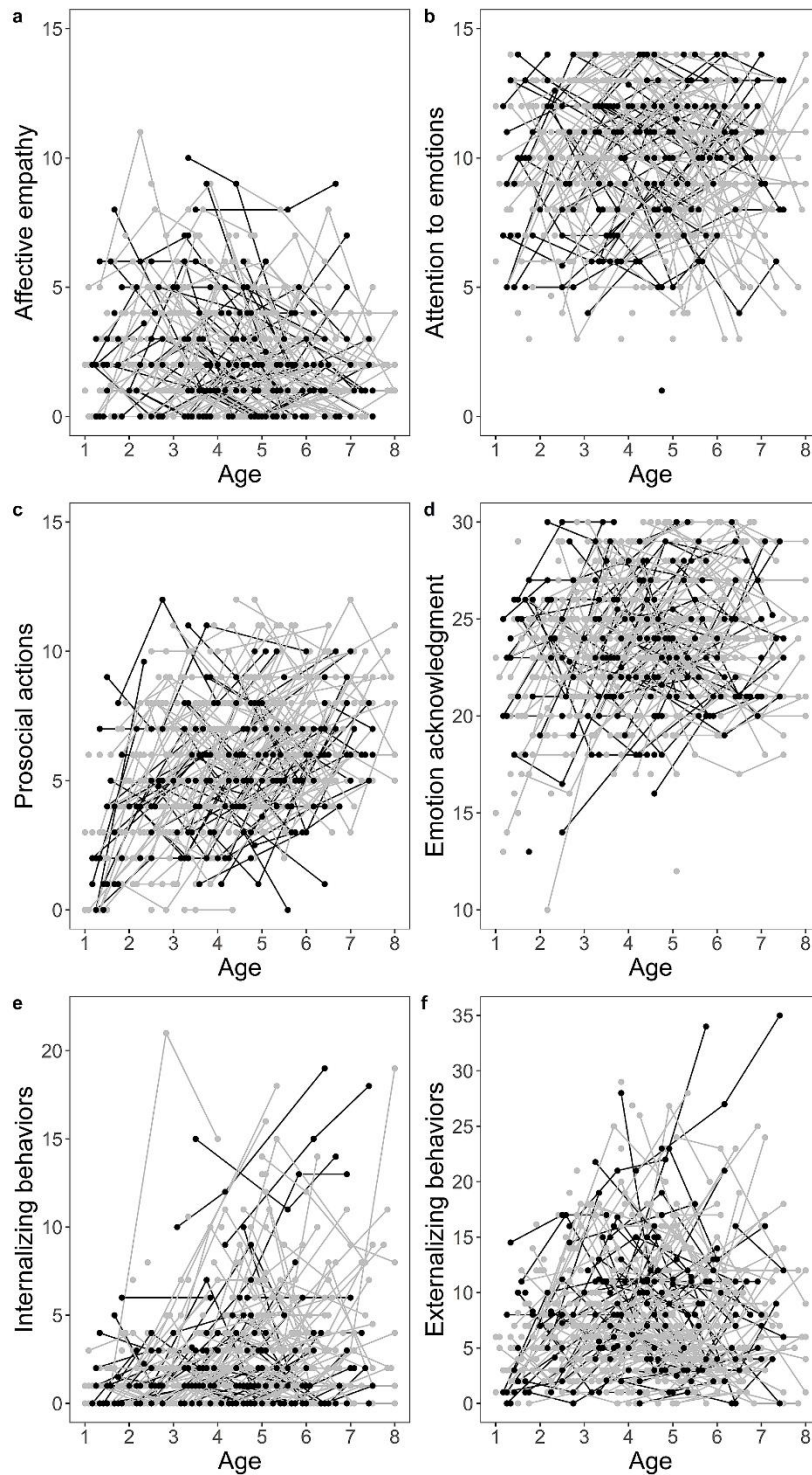

**Fig S1.** Longitudinal graphic representation of age at the four time points of **1a.** affective empathy; **1b.** attention to others' emotions; **1c.** prosocial actions; **1d.** emotion acknowledgment; **1e.** internalizing behaviors; **1f.** externalizing behaviors. Each participant is presented by an individual line and each time point is presented by a point. Children with a cochlear implant are displayed in black, and typically-hearing children in grey.

**Table S1.** *Sample size justification.*

| Analysis                              | Explanation                                                                                                                                                                                                                                                                                                                                                                                                                                                                                                                                                                                      |
|---------------------------------------|--------------------------------------------------------------------------------------------------------------------------------------------------------------------------------------------------------------------------------------------------------------------------------------------------------------------------------------------------------------------------------------------------------------------------------------------------------------------------------------------------------------------------------------------------------------------------------------------------|
| Power analysis for the larger project | An a priori power analysis was conducted for the larger project that embedded this study. It showed that to observe a medium-sized effect (effect size = .35, power = .80, alpha = .05), a minimum total sample size of 216 children would be needed for analyses with four repeated measures and two groups. Note that the analysis was done based on a repeated measure ANOVA design. Later we changed to mixed models for analyzing the data because mixed models can account for the dependency within the data and handle missing or unbalanced data.                                       |
| Power analysis for the present study  | We did not conduct a power analysis specifically for this study because the study was based on the data already collected. Yet, a simulation analysis was conducted via the Optimal Design program (Version 3.01; Raudenbush et al., 2011), to understand the sample size needed for detecting the effect of diagnosis group in multilevel models. It showed that in the case where each participant has two waves of data, an effect of group can be detected with a power $\geq .80$ when the total number of participants is $\geq 150$ (alpha = .05; effect size = .35).                     |
| Estimation of the control group size  | Because (1) the larger project intended to include three clinical groups (hearing loss, autism, developmental language disorder) and a control group that can be matched with the three groups (e.g., the autistic sample was expected to be older than children with a CI, so we needed older control group as well), and (2) typically-developing children tend to have a higher drop-out rate, we included a larger control group size. We intended to avoid possible bias from selection and from estimation, so in this study we included all available data and chose to use mixed models. |

**Table S2.** Mean *T* scores (standard deviations) of internalizing and externalizing symptoms converted according to the Symptom Severity Profile of the Early Childhood Inventory (ECI-4).

|                               | CI           | TH           |
|-------------------------------|--------------|--------------|
| <b>Time 1</b>                 |              |              |
| Oppositional defiant disorder | 51.00 (2.23) | 51.33 (3.13) |
| Conduct disorder              | 55.66 (5.79) | 54.61 (4.56) |
| Peer conflicts                | 55.21 (5.57) | 54.50 (5.67) |
| Major depressive disorder     | 50.97 (1.73) | 51.07 (1.22) |
| Separation anxiety disorder   | 52.97 (3.80) | 52.77 (3.14) |
| Generalized anxiety disorder  | 52.09 (5.14) | 51.29 (3.69) |
| <b>Time 2</b>                 |              |              |
| Oppositional defiant disorder | 52.10 (3.97) | 51.68 (3.63) |
| Conduct disorder              | 57.05 (7.92) | 55.19 (5.06) |
| Peer conflicts                | 56.43 (7.71) | 54.34 (6.25) |
| Major depressive disorder     | 51.06 (1.44) | 51.09 (1.12) |
| Separation anxiety disorder   | 53.62 (5.43) | 52.85 (3.49) |
| Generalized anxiety disorder  | 52.85 (4.51) | 52.89 (5.36) |
| <b>Time 3</b>                 |              |              |
| Oppositional defiant disorder | 51.59 (2.91) | 51.69 (2.71) |
| Conduct disorder              | 56.14 (5.61) | 54.55 (4.43) |
| Peer conflicts                | 54.55 (5.65) | 53.81 (5.95) |
| Major depressive disorder     | 51.16 (1.96) | 50.98 (1.01) |
| Separation anxiety disorder   | 53.77 (5.76) | 53.01 (3.13) |
| Generalized anxiety disorder  | -            | -            |
| <b>Time 4</b>                 |              |              |
| Oppositional defiant disorder | 54.07 (6.92) | 52.35 (4.06) |
| Conduct disorder              | 56.30 (6.81) | 54.79 (5.09) |
| Peer conflicts                | 55.63 (7.90) | 53.84 (6.42) |
| Major depressive disorder     | 51.19 (1.00) | 51.46 (2.79) |
| Separation anxiety disorder   | 55.33 (8.26) | 54.19 (5.29) |
| Generalized anxiety disorder  | -            | -            |

*Note.* CI = children with a cochlear implant; TH = typically hearing children. T scores of 50 to 58 reflects low severity; 60-68 medium severity;  $\geq 70$  high severity. T scores for social anxiety disorder are not provided in the Symptom Severity Profile of the ECI-4. T scores for generalized anxiety disorder are not available for Time 3 and Time 4 because the conversion to T scores involved two items not directly

related to anxiety symptoms (but to symptoms of attention deficit hyperactivity disorder) which were thus not included in the data collection at Time 3 and Time 4.

**Table S3.** *An overview of amount of missing data at the four measurement points.*

|                        | Participants |     | Missing |      |       |      |
|------------------------|--------------|-----|---------|------|-------|------|
|                        | CI           | TH  | CI      |      | TH    |      |
|                        |              |     | Count   | %    | Count | %    |
| <b>Time 1</b>          |              |     |         |      |       |      |
| Age                    | 71           | 272 | 0       | 0    | 0     | 0    |
| Gender                 | 71           | 272 | 0       | 0    | 0     | 0    |
| Fine motor skills      | 55           | 245 | 16      | 22.5 | 27    | 9.9  |
| Parental education     | 53           | 234 | 18      | 25.4 | 38    | 14.0 |
| Household income       | 40           | 177 | 31      | 43.7 | 95    | 34.9 |
| Affective empathy      | 71           | 268 | 0       | 0    | 4     | 1.5  |
| Attention to emotions  | 71           | 268 | 0       | 0    | 4     | 1.5  |
| Prosocial actions      | 71           | 268 | 0       | 0    | 4     | 1.5  |
| Emotion acknowledgment | 71           | 270 | 0       | 0    | 2     | 0.7  |
| Internalizing          | 66           | 257 | 5       | 7    | 15    | 5.5  |
| Externalizing          | 66           | 257 | 5       | 7    | 15    | 5.5  |
| <b>Time 2</b>          |              |     |         |      |       |      |
| Age                    | 46           | 108 | 25      | 35.2 | 164   | 60.3 |
| Affective empathy      | 46           | 108 | 25      | 35.2 | 164   | 60.3 |
| Attention to emotions  | 46           | 108 | 25      | 35.2 | 164   | 60.3 |
| Prosocial actions      | 46           | 108 | 25      | 35.2 | 164   | 60.3 |
| Emotion acknowledgment | 46           | 108 | 25      | 35.2 | 164   | 60.3 |
| Internalizing          | 47           | 99  | 24      | 33.8 | 173   | 63.6 |
| Externalizing          | 47           | 99  | 24      | 33.8 | 173   | 63.6 |
| <b>Time 3</b>          |              |     |         |      |       |      |
| Age                    | 46           | 96  | 25      | 35.2 | 176   | 64.7 |
| Affective empathy      | 46           | 96  | 25      | 35.2 | 176   | 64.7 |
| Attention to emotions  | 46           | 96  | 25      | 35.2 | 176   | 64.7 |
| Prosocial actions      | 46           | 96  | 25      | 35.2 | 176   | 64.7 |
| Emotion acknowledgment | 45           | 96  | 26      | 36.6 | 176   | 64.7 |
| Internalizing          | 44           | 83  | 27      | 38.0 | 189   | 69.5 |
| Externalizing          | 44           | 83  | 27      | 38.0 | 189   | 69.5 |
| <b>Time 4</b>          |              |     |         |      |       |      |
| Age                    | 27           | 67  | 44      | 62.0 | 205   | 75.4 |
| Affective empathy      | 27           | 67  | 44      | 62.0 | 205   | 75.4 |

|                        |    |    |    |      |     |      |
|------------------------|----|----|----|------|-----|------|
| Attention to emotions  | 27 | 67 | 44 | 62.0 | 205 | 75.4 |
| Prosocial actions      | 27 | 67 | 44 | 62.0 | 205 | 75.4 |
| Emotion acknowledgment | 27 | 68 | 44 | 62.0 | 204 | 75.0 |
| Internalizing          | 27 | 63 | 44 | 62.0 | 209 | 76.8 |
| Externalizing          | 27 | 63 | 44 | 62.0 | 209 | 76.8 |

*Note.* CI = children with a cochlear implant; TH = typically hearing children.

**Table S4.** *Pearson’s correlations between study variables.*

|                            | 1.     | 2.     | 3.     | 4.     | 5.     | 6.     |
|----------------------------|--------|--------|--------|--------|--------|--------|
| 1. Age                     | -      |        |        |        |        |        |
| 2. Affective empathy       | -.106* | -      |        |        |        |        |
| 3. Attention to emotions   | .026   | .350** | -      |        |        |        |
| 4. Prosocial actions       | .403** | .150** | .305** | -      |        |        |
| 5. Emotion acknowledgment  | .195** | .016   | .262** | .365** | -      |        |
| 6. Internalizing behaviors | .222** | .272** | .120*  | .042   | -.082  | -      |
| 7. Externalizing behaviors | .095   | .094   | .067   | .025   | -.076* | .374** |

\*  $p < .0083$ ; \*\*  $p < .001$ . Significance level was adjusted by the number of correlation analyses on each variable to  $p < \alpha/6 = .0083$ .

**Table S5.** *Correlations of the measures with hearing-related factors within children with a CI (partial correlation coefficients controlling for age were presented in parentheses).*

|                         | Age at<br>implantation | Duration of<br>using a CI | Type of<br>amplification | Communication<br>mode |
|-------------------------|------------------------|---------------------------|--------------------------|-----------------------|
| Affective empathy       | -.061 (-.012)          | -.094 (.012)              | .156 (.138)              | .073 (.116)           |
| Attention to emotions   | -.020 (-.088)          | .191* (.088)              | .145 (.154)              | .005 (.059)           |
| Prosocial actions       | .123 (.023)            | .267** (-.023)            | -.052 (-.027)            | .073 (.080)           |
| Emotion acknowledgment  | -.010 (-.042)          | .110 (.042)               | .088 (.109)              | -.056 (-.062)         |
| Internalizing behaviors | -.018 (-.112)          | .229* (.112)              | .053 (.078)              | .104 (.122)           |
| Externalizing behaviors | -.037 (-.120)          | .212* (.120)              | .075 (.090)              | -.004 (.016)          |

*Note:* Type of amplification was coded by the number of devices used (1 = only one CI; 2 = one CI and one hearing aid; 3 = two CIs). Communication mode was coded by the extent to which the child used spoken language as the major mode of communication (1 = sign language only; 2 = sign-supported Dutch; 3 = combination; 4 = spoken language only).

\* $p < .0125$ . \*\* $p < .001$ . Significance level was adjusted by the number of correlation analyses on each measure to  $p < \alpha/4 = .0125$ .

**Table S6.** *Regression weights (standard errors) for explaining the developmental trajectories of empathic skills using the full sample (N = 343) and a sub-sample (N = 142, including all 71 children with CI, and 71 typically hearing children randomly selected from the full sample).*

| Parameter     | Affective empathy            |                              | Attention to others' emotions |                             | Prosocial actions              |                                | Emotion acknowledgment         |                             |
|---------------|------------------------------|------------------------------|-------------------------------|-----------------------------|--------------------------------|--------------------------------|--------------------------------|-----------------------------|
|               | N = 343                      | N = 142                      | N = 343                       | N = 142                     | N = 343                        | N = 142                        | N = 343                        | N = 142                     |
| Age linear    | <b>-.01</b><br><b>(.004)</b> | <b>-.02</b><br><b>(.005)</b> | -.01<br>(.006)                | -.01<br>(.009)              | <b>.06</b><br><b>(.005)</b>    | <b>.04</b><br><b>(.006)</b>    | <b>.04 (.006)</b>              | <b>.03</b><br><b>(.008)</b> |
| Age quadratic | -                            | -                            | -                             | -                           | <b>-.001</b><br><b>(.0002)</b> | <b>-.001</b><br><b>(.0002)</b> | <b>-.001</b><br><b>(.0002)</b> | -                           |
| Group         | -                            | -                            | .15 (.32)                     | .19 (.40)                   | <b>-.55 (.26)</b>              | -                              | -                              | -                           |
| Group x Age   | -                            | -                            | <b>.03</b><br><b>(.010)</b>   | <b>.03</b><br><b>(.012)</b> | -.01<br>(.009)                 | -                              | -                              | -                           |

*Note.* Group was coded as 0 = typically hearing, 1 = cochlear implant. Significant effects are bolded.

**Table S7.** *Regression weights (standard errors) of empathic skills (mean and change scores) for predicting internalizing/externalizing behaviors using the full sample (N = 343) and a sub-sample (N = 142, including all 71 children with CI, and 71 typically hearing children randomly selected from the full sample)*

| Parameter              |        | Internalizing     |                   | Externalizing     |                  |
|------------------------|--------|-------------------|-------------------|-------------------|------------------|
|                        |        | N = 343           | N = 142           | N = 343           | N = 142          |
| Age                    |        | <b>.06 (.007)</b> | <b>.06 (.009)</b> | <b>.04 (.01)</b>  | <b>.04 (.02)</b> |
| Gender                 |        | .42 (.32)         | .77 (.50)         | -1.07 (.56)       | -1.06 (.88)      |
| Group                  |        | -.26 (.38)        | -.60 (.50)        | .44 (.66)         | .65 (.87)        |
| Affective empathy      | Mean   | <b>.63 (.10)</b>  | <b>.73 (.16)</b>  | <b>.35 (.16)</b>  | -.06 (.28)       |
|                        | Change | <b>.23 (.10)</b>  | .19 (.11)         | .19 (.15)         | .15 (.19)        |
| Attention to emotions  | Mean   | .07 (.08)         | -.002 (.12)       | .15 (.13)         | .07 (.22)        |
|                        | Change | <b>.19 (.08)</b>  | <b>.24 (.09)</b>  | -.09 (.13)        | -.19 (.17)       |
| Prosocial actions      | Mean   | -.16 (.08)        | -.21 (.14)        | -.01 (.14)        | -.09 (.24)       |
|                        | Change | -.06 (.08)        | -.06 (.09)        | .06 (.13)         | .32 (.16)        |
| Emotion acknowledgment | Mean   | -.11 (.06)        | -.18 (.10)        | <b>-.21 (.10)</b> | -.22 (.18)       |
|                        | Change | -.05 (.06)        | -.03 (.07)        | -.12 (.10)        | -.13 (.12)       |

*Note.* Gender was coded as 0 = boys, 1 = girls. Group was coded as 0 = typically hearing, 1 = cochlear implant. Significant effects are bolded.
